# Supplementary material for: Multivariate hydrological data assimilation of soil moisture and groundwater head
Source: Copernicus journal article supplement (doi:10.5194/hess-2016-126), 2016-04-05
Supplement: Supplementary file [file revised_manuscript.pdf › revised_manuscript.pdf]

# 1 Multivariate hydrological data assimilation of soil moisture and 2 groundwater head

3 Donghua Zhang<sup>1</sup>, Henrik Madsen<sup>2</sup>, Marc E. Ridler<sup>2</sup>, Jacob Kidmose<sup>3</sup>, Karsten H. Jensen<sup>1</sup>, and Jens C.  
4 Refsgaard<sup>3</sup>

5 <sup>1</sup>Department of Geosciences and Natural Resource Management, University of Copenhagen, Copenhagen, Denmark

6 <sup>2</sup>DHI, Hørsholm, Denmark

7 <sup>3</sup>Geological Survey of Denmark and Greenland (GEUS), Copenhagen, Denmark

8 *Correspondence to:* Donghua Zhang (donghua.zhang@ign.ku.dk)

9 **Abstract.** Observed groundwater head and soil moisture profiles are assimilated into an integrated hydrological model. The  
10 study uses the Ensemble Transform Kalman Filter (ETKF) data assimilation method with the MIKE SHE hydrological  
11 model code. The method was firstly tested on synthetic data in a catchment of less complexity (the Karup catchment in  
12 Denmark), and later implemented using data from real observations in a larger and more complex catchment (the  
13 Ahlergaarde catchment in Denmark). In the Karup model, several experiments were designed with respect to different  
14 observation type, ensemble size and localization scheme, to investigate the assimilation performance. The results showed the  
15 necessity to using localization especially when assimilating both groundwater head and soil moisture. The proposed scheme  
16 with both distance localization and variable localization was shown to be more robust and provide better results. Using the  
17 same assimilation scheme in the Ahlergaarde model, groundwater head and soil moisture were successfully assimilated into  
18 the model. The hydrological model with assimilation showed an overall improved performance compared to the model  
19 without assimilation.

20

# 1 1 Introduction

2 Integrated hydrological modelling plays an important role in water resources management to develop sustainable  
3 environmental and economic schemes. Integrated models offer advantages with respect to incorporating different physically-  
4 based hydrological processes and providing a consistent prediction of different hydrological variables. Hydrological data  
5 assimilation aims to utilize the information embedded in hydrological observations for improving the performance of  
6 hydrological models. Data assimilation (DA) has the advantage to exploit both imperfect models and limited observations to  
7 provide a more accurate prediction and considering uncertainties on both sides.

8 Groundwater head and soil moisture are two key variables in hydrological modelling of the saturated and unsaturated zones  
9 respectively. Several applications of assimilating each variable individually in either groundwater models or land surface  
10 models have been reported. For example, Chen and Zhang (2006) presented an application of the Ensemble Kalman Filter  
11 (EnKF) to a groundwater flow model with updating of both groundwater head and hydraulic conductivity. De Lannoy et al.  
12 (2007) applied EnKF for soil moisture state and bias estimation in a small field using the CLM (Community Land Model).  
13 There are also few studies with assimilating both groundwater head and soil moisture. For example, Visser et al. (2006) used  
14 groundwater head and soil moisture data to re-calibrate the SWAP (Soil, Water, Atmosphere and Plant) model on-line using  
15 a simplified form of Newtonian nudging, and showed superior results compared to off-line calibration.

16 The combination of multivariate assimilation and integrated hydrological models provides great potential to deepen our  
17 understanding of the value of different measurement data. Several studies of multivariate assimilation applications in  
18 integrated hydrological models have been reported. Xie and Zhang (2010) applied EnKF to the Soil and Water Assessment  
19 Tool (SWAT), with updating of multiple states and parameters including runoff, soil moisture and evapotranspiration.  
20 Camporese et al. (2009) used EnKF in the CATHY (CATchment HYdrology) model with coupled surface and subsurface  
21 flow, to assimilate groundwater head and stream discharge. Rasmussen et al. (2015) assimilated the same variables using the  
22 ensemble transform Kalman filter (ETKF) with the MIKE SHE model. Kurtz et al. (2014) jointly assimilated groundwater  
23 heads and groundwater temperatures with EnKF using both synthetic and real-world models. Shi et al. (2014) employed  
24 EnKF to assimilate multivariate hydrological states in a small catchment modelled by the land surface model Flux-PIHM,  
25 with a focus on parameter estimation. Lee et al. (2011) used the variational assimilation approach to assimilate streamflow  
26 and in-situ soil moisture, to correct the soil moisture profiles within the HL-RDHM model. Ridler et al. (2014b) developed a  
27 generic DA framework that enables coupling hydrological models with the OpenDA library (<http://www.openda.org>) using  
28 the Open Model Interface OpenMI (Gregersen et al., 2007), and applied it with the MIKE SHE model. Han et al. (2015)  
29 developed an open source multivariate DA framework DasPy for the Community Land Model. Although many multivariate  
30 DA platforms and applications have been reported, assimilating both soil moisture and groundwater head in an integrated  
31 hydrological model has not been studied in detail. Representing two important hydrological variables, their observational  
32 values by assimilation in integrated hydrological models are explored in this study.

1 Meanwhile, techniques have been developed for multivariate DA. The most straightforward approach used in integrated  
2 models is state augmentation, which is commonly applied with EnKF and its variants, with nearly no additional  
3 modifications on algorithms. The observation vector can be extended to accommodate multiple types of observations.  
4 Similarly, the state vector can be augmented to include all relevant state variables, and possibly model parameters. The  
5 covariance matrix is thereby expanded to a block matrix where each block presents the cross-covariance between variables in  
6 the state vector (Montzka et al., 2012). A potential challenge in this respect is that implementing EnKF techniques like  
7 localization no longer becomes straightforward. Commonly used localization techniques usually belong to covariance  
8 localization (Hamill et al., 2001) or local analysis (Anderson, 2003). When updating a single state variable with  
9 corresponding measurements, distance localization is usually used to reduce the impact of long distance sampling errors in  
10 the forecast error covariance due to a limited ensemble size. In addition, when there are more than one state variable, the  
11 degree of localization for each variable needs to be appropriately specified. Another incidental fact in multivariate DA is that  
12 the spurious correlation across variables is usually more pronounced leading to deterioration of the model updating. To  
13 overcome this problem, Kang et al. (2011) successfully introduced ‘variable localization’ in addition to distance localization  
14 and tested this with the local ensemble transform Kalman filter (LETKF) in a carbon cycle model.  
15 In this study, we systematically investigate the performance of a filter assimilating soil moisture and groundwater head, with  
16 respect to the assimilated variable type, localization scheme and ensemble size. The assimilation method is based on ETKF  
17 (Bishop et al., 2001), distance localization using local analysis (Sakov and Bertino, 2010), and variable localization (Kang et  
18 al., 2011). The approach is first tested on a catchment of less complexity (the Karup catchment in Denmark) and using  
19 synthetically generated data, and later implemented in a larger and more complex catchment (the Ahlergaarde catchment in  
20 Denmark) using real data. From the methodology point of view, the novelty of this study is the use of advanced multivariate  
21 assimilation methodologies in combination with application of different localization schemes. From the application point of  
22 view, the novelty of this study is to investigate the value of assimilated variables and their impact on other processes through  
23 integrated hydrological modelling in a complex catchment using real data.  
24 The paper is organized as follows: the two study areas and the hydrological modelling processes are introduced in section 2;  
25 the detailed assimilation methodology is described in section 3; section 4 presents the experimental settings and the  
26 assimilation results based on the Karup catchment; section 5 presents the real observations, experimental settings and the  
27 results based on the Ahlergaarde catchment; and finally general discussions and conclusions are given in section 6.

## 28 **2 Hydrological Modelling**

### 29 **2.1 Study areas**

30 Two study areas in Denmark are used in this study. The 440 km<sup>2</sup> Karup catchment is located in the centre of Jutland (left in  
31 Fig. 1). The land use is mainly agriculture, and topographical elevation is between 20 and 100 m. The catchment lies in an  
32 alluvial plain with coarse sandy soils and a strongly groundwater dominated hydrological regime. The Ahlergaarde

1 catchment is located in one of the most irrigated areas of Denmark (right in Fig. 1). Of the total catchment area of 1044 km<sup>2</sup>,  
2 61% is covered by agricultural crops. The surface geology consists mostly of sand and also in this catchment the streamflow  
3 is dominated by groundwater inflow.  
4 The Karup catchment is a well-studied catchment in terms of model parameterisation and model calibration (Refsgaard,  
5 1997;Madsen, 2003;Zhang et al., 2015). A relatively simple model with fast computation time was developed for this  
6 catchment to test and verify various DA methods. The Ahlergaarde catchment is the research catchment of the Danish  
7 Hydrological Observatory (HOBE) (Jensen and Illangasekare, 2011). This study area is ideal to further test DA methods  
8 using real measurements.

## 9 **2.2 Hydrological model**

10 The MIKE SHE hydrological modelling system is used for developing models for the above two catchments. As a  
11 physically-based distributed hydrological model, MIKE SHE simulates the major processes in the water cycle including  
12 evapotranspiration, overland flow, unsaturated flow, groundwater flow, river flow and the interactions between them. MIKE  
13 SHE also has the flexibility of modelling each process at given spatial and temporal resolutions with different complexity.  
14 The complexity can be chosen according to the model purpose and data availability (Graham and Butts, 2005).  
15 In the Karup catchment, the modelling is based on the following process descriptions: groundwater flow is assumed  
16 horizontal and is therefore modelled by one computational layer, drain flow (pipes/ditches) is described by a simple  
17 conceptual relationship and occurs when the groundwater table exceeds the drain level, 1D unsaturated flow is assumed and  
18 based on a simplified gravity-based flow equation, 1D channel flow is assumed and based on kinematic routing, 2D overland  
19 flow routing is based on the diffusive wave approximation of the Saint Venant equations, evapotranspiration is described  
20 including interception, soil evaporation and transpiration by vegetation (DHI, 2015). The numerical discretization in the  
21 horizontal plane is 1000 x 1000 m<sup>2</sup> grid size. The model is forced by station-based daily precipitation and uniform daily  
22 values for reference evaporation. In MIKE SHE model, the temporal resolution is dynamic and differs between the modules.  
23 For the maximum allowed time step 6 hours is specified for overland flow, 6 hours for unsaturated flow and 12 hours for  
24 saturated flow respectively. Overall, the Karup model is running at temporal resolution of less than half a day.  
25 For the Ahlergaarde catchment, the same components are included as for the Karup catchment. For computational efficiency,  
26 and due to the fact that the exact irrigation information in terms of both location and amount is not known, the irrigation  
27 module is not activated in the model. The modelling approaches are the same as for Karup except that 3D groundwater flow  
28 is considered with six numerical layers defined according to geological stratigraphy. Another main difference is that the  
29 model uses a smaller grid size (200 x 200 m<sup>2</sup>). The finer model discretisation enables the model to utilize finer resolution  
30 system data such as geological stratigraphy, soil type and land use. The model is forced with grid-based daily precipitation,  
31 temperature and reference evaporation. In both catchments no-flow boundaries are defined along the catchment borders. The  
32 temporal resolution in the model is constrained by maximum time steps of 2 hours for overland flow, 2 hours for unsaturated

1 flow and 6 hours for saturated flow respectively. The model parameterisation and model calibration are introduced in the  
2 section 2.3.  
3 The improved model resolution and complexity for the Ahlergaarde catchment increases the simulation time significantly.  
4 For example, the average model time step in the groundwater zone decreases from 7.5 hours in the Karup model to 1.3 hours  
5 in the Ahlergaarde model. In consequence one year's model simulation takes less than one minute for Karup and around one  
6 hour for Ahlergaarde. The differences in model resolution and simulation time for the two catchments are summarized in  
7 Table 1.

## 8 **2.3 Model calibration**

9 For both catchments, the model parameterisation is kept relatively simple yet able to represent the overall spatial patterns of  
10 key model parameters. When specifying the parameter values for each property class (e.g., geological unit, vegetation types  
11 and soil types), most of the parameters cannot be estimated empirically or directly inferred from the data. Thus model  
12 calibration is usually required using an optimization algorithm like AUTOCAL (Madsen, 2003) or PEST (Doherty, 2010).  
13 For the Karup model, the most sensitive parameters describing the hydraulic properties of the river, unsaturated zone,  
14 saturated zone, and river-aquifer interaction are calibrated using AUTOCAL (Zhang et al., 2015). As calibration data we use  
15 35 biweekly groundwater head observations and daily observations of stream discharge for a six year period (1969-1974)  
16 (Fig. 1).  
17 The Ahlergaarde model is calibrated using PEST version 11.8 (Doherty, 2010). The data used in the calibration are  
18 groundwater head observations (466 in total) scattered over the catchment (not shown in Fig. 1) and river discharge  
19 observations from the period of 2006-2009. In most of the groundwater wells only one observation is available for the entire  
20 calibration period and only few wells have time series. Discharge data comprise time series of daily values from five stations  
21 (Fig. 1). Similar to the Karup catchment, the most sensitive parameters (seven parameters) are selected for calibration, with  
22 13 parameters tied to those seven parameters. The calibrated values for those seven parameters are listed in Table 2 (first  
23 seven parameters) together with the confidence intervals obtained from the inversion process. The rest parameters in Table 2  
24 are not included for calibration, but only selected for perturbation with detailed explanation given in section 5. The original  
25 calibrated model uses a simplified two-layer approach to simulate unsaturated flow and evapotranspiration, where the  
26 average soil moisture is calculated for the root zone and the layer below the root zone. In order to assimilate in-situ soil  
27 moisture data at different depths, the gravity flow module is used as a replacement of the two-layer approach in the  
28 unsaturated zone. By doing so, soil moisture can be calculated at different depths. The overall modelling performance in  
29 terms of water balance and discharge dynamics becomes marginally reduced compared to the original calibration results.

### 1 3 Data assimilation

#### 2 3.1 Ensemble transform Kalman filter

3 The assimilation algorithm used in this study is the ETKF, which is a popular variation of the EnKF (Evensen, 2003).  
4 Similar to EnKF, ETKF is a Monte Carlo implementation of the Kalman filter, which approximates the posterior probability  
5 distribution conditioned on a series of observations, and is able to deal with nonlinear models. In comparison to EnKF,  
6 ETKF is a deterministic filter as it does not require additional observation perturbations. The ETKF was originally  
7 introduced by (Bishop et al., 2001), and later modified to be unbiased (Wang et al., 2004). As an ensemble-based  
8 deterministic filter, it has the advantage to calculate the forecast error covariance efficiently. It is also computationally faster  
9 than the ensemble square root filter (EnSRF) (Whitaker and Hamill, 2002).

10 To develop the DA algorithm, a state-space formulation is needed

$$X_{t+1} = M(X_t, U_t, \theta) \approx M_d(X_t, \bar{U}_t, \bar{\theta}) \quad (1)$$

11 where  $M$  is the stochastic model operator based on the numerical solution to the MIKE SHE equations,  $M_d$  is the  
12 deterministic MIKE SHE model operator,  $X_t$  and  $U_t$  are the state vector and model forcing at time step  $t$ ,  $\theta$  stands for the  
13 model parameters.  $\bar{U}_t$  and  $\bar{\theta}$  are the perturbed forcing and parameters respectively. Note that the stochastic model operator  $M$   
14 is approximated by the deterministic MIKE SHE model with taking both model forcing uncertainty and model parameter  
15 uncertainty into account (Zhang et al., 2015). In both models, precipitation and potential evapotranspiration are perturbed by  
16 adding a random Gaussian noise to the actual value. The parameter uncertainty is described mainly using the covariance  
17 estimated from calibration. The selected parameters are assumed to be multivariate normal/lognormal distributed and  
18 perturbed using Latin hypercube sampling based on the associated parameter covariance. Additional post-processing steps  
19 are used to ensure that the perturbed parameters are still within realistic parameter ranges.

20 At time  $t+1$ , the observations can be written as,

$$Y_{t+1} = HX_{t+1} + \varepsilon_{t+1}, \varepsilon_{t+1} \sim N(0, R_{t+1}) \quad (2)$$

21 where  $Y$  denotes the observation vector, and  $H$  is the linear mapping operator specifying the deterministic relationship  
22 between observations and model state  $X$ . In this study, the observations are either groundwater head, soil moisture or both.  
23 Similarly, the state vector consists of groundwater head, soil moisture, or both. When two variables are assimilated, the state  
24 vector is augmented to accommodate both variables at all computational cells, and the observation operator  $H$  is revised to  
25 select the correct model equivalent and compare with the corresponding observation. The observation noise is assumed to be  
26 Gaussian, temporally-uncorrelated, spatially-uncorrelated, with zero-mean and a prescribed constant standard deviation  $\sigma_r$ .  
27 Therefore,  $R_{t+1}$  is a diagonal matrix with constant values along the diagonal (i.e.,  $R_{t+1} = \text{diag}(\sigma_r^2, \dots, \sigma_r^2)$ ).

28 The forecast state distribution can be estimated by a finite number  $m$  of model realisations from Eq.(1) as follows,

$$X^f = [x^{f1}, x^{f2}, \dots, x^{fm}] \quad (3)$$

29 where the superscript  $f$  stands for ‘forecast’.

30 The forecast error covariance can be written as

$$P^f = X'^f (X'^f)^T / (m - 1) \quad (4)$$

1 where  $X'^f$  is the forecast ensemble perturbation

$$X'^f = [x^{f1} - \bar{X}^f, x^{f2} - \bar{X}^f, \dots, x^{fm} - \bar{X}^f] \quad (5)$$

2 and  $\bar{X}^f$  is the ensemble mean. After assimilation, both the analysed state mean and the analysed error covariance can be  
3 calculated:

$$\bar{X}^a = \bar{X}^f + K(Y - H\bar{X}^f) \quad (6)$$

$$P^a = (I - KH)P^f \quad (7)$$

4 where the superscript  $a$  stands for ‘analysed’, and  $K$  is the Kalman gain defined as

$$K = P^f H^T (H P^f H^T + R)^{-1} \quad (8)$$

5 In practise,  $P^a$  is never explicitly calculated and only the ensemble mean and ensemble anomalies are updated. Based on  
6 factorizing Eq. (7) on both sides the following equation is obtained:

$$X'^a = X'^f T \quad (9)$$

7 where

$$T = [I + (H X'^f)^T R^{-1} H X'^f / (m - 1)]^{-1/2} U \quad (10)$$

8 and  $U$  is an arbitrary orthonormal matrix  $U U^T = I$ .

9 The MIKE SHE model is coupled with a generic DA library that handles the time propagation and update of the model  
10 ensemble based on the ETKF (Ridler et al., 2014b).

### 11 **3.2 Localization**

12 In ensemble based Kalman filter systems, the forecast state and its associated uncertainty are represented by a limited  
13 ensemble of realizations. The undersampling can lead to filter inbreeding and spurious correlations in the error covariance  
14 matrix, which potentially can lead to filter divergence. Localization is a commonly used technique when applying ensemble  
15 based Kalman filters to overcome this problem. By artificially reducing the impacted spatial domain of observations, the  
16 spurious correlation between two remote locations can be avoided. For each element in the state vector, local analysis (LA,  
17 (Sakov and Bertino, 2010)) is used to approximate the state error covariance within the local window. The ensemble  
18 anomalies outside this local window will be unchanged during the filter updates. However, LA is usually applied to a single  
19 state variable for which certain spatial correlations exists. When the state vector contains two or more variables, specifying  
20 the localization degree for each variable is not straightforward. More importantly, correlations between variables are not  
21 clear because physical distances between variables may not exist. Similar to the approach by Kang et al. (2011), we  
22 introduced different variable localization schemes based on whether the correction of one variable can impact the update of  
23 other variables. In this section, the distance localization will be introduced first followed by the variable localization.

### 3.2.1 Distance localization

We formulate the distance-localized ETKF equations with similar notations as in Sakov and Bertino (2010). A variable with an upper accent ‘ $i$ ’ means a local variable, which is used to update the  $i$ ’th element of the state vector. During the updating with localization,  $i$  is looped for each element in the state vector. For example,  $\overset{i}{K}$  means the local Kalman gain,  $\overset{i}{y}$  denotes the local observations associated with the  $i$ ’th element in the state vector. In matrices, the subscript ‘ $i,:$ ’ refers to the  $i$ ’th row. To avoid the occasional sudden changes of analysis from one state vector element to the next one when an observation just arrives or exits the local window, an ensemble tapering with a distance-based tapering function  $f(\cdot)$  is used to ensure the impact of the observation is reduced gradually from the centre to the boundary within the local domain (Sakov and Bertino, 2010).

Therefore, to update the  $i$ ’th element, the localized-ETKF equations (Eq. (6), (9), (10)) become

$$\overline{X}_t^a = \overline{X}_t^f + K_{i,:}^i (\overset{i}{Y} - \overline{H X^f}) \quad (11)$$

$$K_{i,:}^i = X_{i,:}^{\prime f} S^T (I + S S^T)^{-1} R^{-1/2} / \sqrt{m-1} \quad (12)$$

$$X_{i,:}^{\prime a} = X_{i,:}^{\prime f} T^i \quad (13)$$

$$T^i = (I + S S^T)^{-1/2} U^i \quad (14)$$

$$S^i \stackrel{\text{def}}{=} R^{-1/2} H X_{i,:}^{\prime f} / \sqrt{m-1} \quad (15)$$

During the update, the observation  $\overset{i}{Y}$ , innovations  $\overset{i}{Y} - H X^f$ , observation error variance  $R$  and ensemble observation anomalies  $H X^{\prime f}$  are tapered in line with the taper function  $f(\cdot)$ . The LA taper function is usually determined by the distance between two model points, which decreases from one to zero as the distance increases. Different choices of distance-dependant covariance functions can be used according to dimension and physical property. For example, Sakov and Bertino (2010) use the Gaspari and Cohnv 1D taper function to compare different localization methods. Ridler et al. (2014a) use a 2D squared exponential covariance function as taper function to localize the soil moisture updating. In this study, due to the difference in variable type and variable dimension, the taper function is chosen to be case specific based on the 2D squared exponential covariance function.

For groundwater heads, in both catchments, the LA taper function is chosen to have a radius of 5 km, to include a relatively large number of observations to correct each node, and also to provide larger spatial influence of the update. For the Ahlergaarde catchment where the groundwater is modelled in 3D, the LA localization is applied to each layer with the same radius. For soil moisture, the measurements usually represent a relatively smaller spatial scale. In both catchments, localization scales are specified to ensure that the state correction from the assimilated observation is localized. Horizontally, the taper function is chosen to have a radius of 1 – 5 km at the layer where soil moisture is screened. Because most of the



1 data are measured in the surface and near-surface soil (5 - 25 cm depth), the water content in the upper layers (e.g., within 1  
2 m or 0.5 m depth) are expected to have a larger correction compared to the water content in deeper layers. Therefore, when  
3 the depth exceeds the soil moisture observation, we add a quadratically increasing cut-off value for the covariance function  
4 as the depth increases (Fig. 2).

### 5 **3.2.2 Variable localization**

6 Variable localization is an option when assimilating both groundwater head and soil moisture. Variable localization  
7 determines whether the information from one variable can be used to update the other. When variable localization is off, no  
8 matter the available observation type (groundwater head, soil moisture or both), all observation data are used to update the  
9 ensemble mean (Eq. (11)) and anomaly (Eq. (13)) for both variables. Therefore the correlation between the variables is kept  
10 during the assimilation. In addition, if distance localization is applied, the correlation exists in localized domains between  
11 variables. When variable localization is applied, each observation type will only be used to update its own type of state  
12 variable. Other variables in the state vector will be unchanged during update. If distance localization is applied, state updates  
13 are spatially localized within its own type of variable.

14 Practically, the variable localization can be done by slight modifications to Eq. (11-15). The tapering function is extended to  
15 have an ‘if/else’ statement prior to the existing distance-based tapering function, depending on variable localization is chosen  
16 or not. Here we explain the process of updating one element when variable localization is applied. When looping over the  
17  $i$ ’th element in the state vector, the state in the ‘local’ window is selected first by ensuring it has the same variable type as in  
18 the  $i$ ’th element, then calculating the weight according to the distance from the  $i$ ’th element. For example, when updating soil  
19 moisture in a grid cell, the ensemble mean and anomaly will be unaffected by soil moisture observations outside the local  
20 window, as well as by groundwater head observations.

## 21 **4 Study in the Karup catchment**

22 In the Karup catchment experiment, the calibrated model described in section 2.3 is used as the deterministic model. The  
23 calibrated model has relatively good performance in reproducing the observations, with averaged RMSE of around 1 meter  
24 for groundwater head and Nash Sutcliffe score of 0.4 for discharge at catchment outlet. In Fig. 3 are shown examples  
25 demonstrating the model performance for a groundwater head station and a discharge station.

26 The ensemble is generated by adding appropriate model error to the deterministic model. Similarly, given the predefined  
27 model error, a single random model realisation is generated to be the “true” model. Note that the “true” model here is only an  
28 assumption of reality. The model error is defined by perturbing both model forcing (precipitation and potential  
29 evapotranspiration) and selected model parameters (Zhang et al., 2015). The ensemble is running freely from 1969/12/01 to  
30 1973/01/01 as a warm-up period. During the warm-up period, each ensemble member starts with the same initial condition

1 but has different model trajectories because of different forcing and parameter values. It is important to generate an ensemble  
2 with a realistically large spread, so that the model uncertainty can be fully represented by the ensemble spread.  
3 The synthetic observation used to be assimilated are generated from the “true” model. Given the true realization, by adding  
4 measurement errors to certain model variables at given time and location, a set of synthetic observations can be produced.  
5 Both groundwater head and soil moisture (depths of 5 cm and 25 cm) are extracted from the same 35 locations as the actual  
6 head observations (Fig. 1). For simplicity, the observation noise for each variable is assumed to be white Gaussian, with  
7 homogeneous and constant standard deviation of 0.15 m for head and 5% for the soil volumetric water content. Due to the  
8 fact that groundwater head has a much slower dynamic compared to the unsaturated flow, we assimilate head with weekly  
9 frequency and soil moisture with daily frequency.  
10 After the warm-up period, the synthetic observations are assimilated over a one year period from 1973/01/01 to 1974/01/01.  
11 Given the fact that the “true” model is known, the deterministic model can be seen as an imperfect model. With the purpose  
12 to combine the imperfect model and the synthetic observations, different experiments are carried out to investigate under  
13 which condition the assimilation result are most similar to the ‘true’ model. These experiments are designed using different  
14 observation variables, localization scheme and ensemble size. The assimilation performance can be assessed by taking the  
15 root mean square error (RMSE) between the model simulation and the true state for selected variables over the entire domain  
16 at all available time steps. As soil moisture measurements are depth-dependent, RMSE is calculated for each depth (each  
17 layer). Here we not only show the results from 5 cm and 25 cm depths where observations are assimilated, but also at 50 cm  
18 depth. In addition, other hydrological responses in the form of evapotranspiration and discharge are evaluated.

#### 19 **4.1 Univariate assimilation**

20 When a single variable is assimilated (groundwater head or soil moisture), the state vector only consists of the corresponding  
21 observed variable at all model grid cells. Therefore, the remaining variables will not be changed directly from the filter.  
22 However, as both the groundwater component and unsaturated zone are fully coupled with surface water and other model  
23 components, the whole model state will be affected from updating a single variable. Different experiments are carried out  
24 using an ensemble size of 60:

25

26 NoDA: deterministic model without DA.

27 DA\_H: assimilating head without localization.

28 DA\_HLoc: assimilating head with horizontal localization radius of 5 km.

29 DA\_SM5: assimilating soil moisture at 5 cm depth without localization.

30 DA\_SM5Loc: assimilating soil moisture at 5 cm depth with localization of 5 km spatial radius within 1 m depth.

31 DA\_SM5LocSmall: assimilating soil moisture at 5 cm depth with localization of 3 km spatial radius within 50 cm depth.

32 DA\_SMBBoth: assimilating soil moisture at both 5 cm and 25 cm depths without localization.

33 DA\_SMBBothLoc: assimilating soil moisture at both 5 cm and 25 cm depths with 5 km spatial radius within 1 m depth.

1

2 As the experiment names indicate, H stands for groundwater head and SM stands for soil moisture. Loc indicates that

3 localization is added to the experiment.

4 Results from the DA experiments are shown in Fig. 4. When head is assimilated (DA\_H), RMSE for head improves

5 significantly from 0.21 m to 0.08 m. However, soil moistures at the three depths are basically not influenced. When

6 localization is used (DA\_HLoc), the corrections are localized around the head observations and the overall performance is

7 slightly degraded.

8 When soil moisture at 5 cm depth is assimilated alone without localization (DA\_SM5), the soil moisture profile clearly

9 improves at all three depths. However, for head the performance is almost the same as in the deterministic model. Different

10 localization scales have been tested with assimilating soil moisture at 5 cm depth (DA\_SM5Loc and DA\_SM5LocSmall).

11 The result indicates that the overall assimilation performance decreases with smaller localization scale.

12 When soil moisture at both 5 cm and 25 cm depths are assimilated (DA\_SMBBoth and DA\_SMBBothLoc), the performances

13 are similar regardless of localization. Compared to result from DA\_SM5, the soil moisture estimate improves at 25 cm while

14 slightly worsens at 5 cm. Compared to DA\_SM5Loc, the results show some improvements at 25 cm and 50 cm. Again,

15 groundwater head is hardly influenced by assimilating soil moisture. In the following experiments, we include observations

16 at both 5 cm and 25 cm when soil moisture is assimilated.

17 As we can see from above, univariate assimilation with localization improves the estimate of the assimilated variable albeit

18 the results are slightly worse compared to the experiment without localization in the case of assimilating head or soil

19 moisture at 5 cm. This could be explained as follows. Firstly, spatial correlations are affected by the catchment size and the

20 relatively large grid size used. Pronounced correlations exist even between remote locations, and therefore localization may

21 cut off true correlations, which leads to a worse result overall. Secondly, there are a relatively large number of observations

22 compared to the size of the state vector, which reduces the problem of spurious correlation. Study shows that there is a

23 strong relationship between the significance of spurious correlation and the number of observations (Rasmussen et al., 2015).

24 Localization is more effective to reduce spurious correlation when the number of observations is relatively small.

## 25 **4.2 Multivariate assimilation**

26 In this section, several experiments assimilating both groundwater head and soil moisture are carried out with a focus to test

27 different localization schemes. The abbreviation D and V indicate distance localization and variable localization

28 respectively.

29

30 DA\_HSM: assimilating both head and soil moisture (at both 5 cm and 25 cm depths) without localization to any variable.

31 DA\_HSMLoc\_DV: assimilating both head and soil moisture (at both 5 cm and 25 cm depths) with variable localization and

32 with distance localization applied to head (same as DA\_HLoc) and soil moisture (same as DA\_SMBBothLoc).

1 DA\_HSMLoc\_D: assimilating both head and soil moisture (at both 5 cm and 25 cm depths) without variable localization,  
2 but with distance localization applied to head (same as DA\_HLoc) and soil moisture (same as DA\_SMBBothLoc).  
3 DA\_HSMLoc\_V: assimilating both head and soil moisture (at both 5 cm and 25 cm depths) with variable localization, but  
4 without distance localization to any variable.

5

6 Results from the DA experiments are shown in Fig. 5. When neither distance localization nor variable localization is used,  
7 all observations are used to update the state in all grids for each variable (DA\_HSM). In this case the estimated correlations  
8 between groundwater head and soil moisture are used in the update. The DA results show improved performance for soil  
9 moisture at 5 cm and 25 cm, but much worse performance at 50 cm as well as for groundwater head. In the current filter  
10 settings the full state covariance matrix contains unrealistic, spurious correlations, which eventually degrade the update in  
11 the deeper soil layers.

12 In experiment DA\_HSMLoc\_DV, both distance localization and variable localization are used. Therefore, the state updates  
13 are spatially localized within own variable and the correlation between the two variables is neglected. Particularly in this  
14 case, when there is only soil moisture observation assimilated, the updates are limited to upper 1 m soil moisture profile  
15 while no correction is made for head. When both types of observation are assimilated, the corrections are made for each  
16 variable using its own error information. We can see from Fig.5 that the experiment shows overall improved result.

17 In experiment DA\_HSMLoc\_D, distance localization is applied to head and soil moisture but variable localization is not  
18 included. In this case, regardless of observation type, the soil moisture is corrected within 1 m depth together with head. The  
19 result from this experiment shows improved estimate for soil moisture at 5 cm and 25 cm, together with groundwater head.  
20 However, the soil moisture at 50 cm is slightly worsened. This indicates that the correlation between surface soil moisture  
21 and groundwater head estimated from the ensemble is valid and improves the assimilation performance. Compared to  
22 DA\_HSM, the result shows that excluding the error information from deeper soils (below 1 m to saturation) reduces spurious  
23 correlations and improves the performance. However, compared to DA\_HSMLoc\_DV, the result is slightly worse for head  
24 and deeper soil moisture.

25 In experiment DA\_HSMLoc\_V, distance localization is off and variable localization is applied. This means that the error  
26 information from one variable is used to update the entire domain of its own variable but does not affect the other variable.  
27 The result indicates worse assimilation performance for soil moisture at 50 cm and for groundwater head. One potential  
28 reason is that the lower layers of the unsaturated zone are usually fully saturated but in this experiment corrected by the  
29 surface soil moisture observation, while the groundwater head is corrected by the head observation. Potential inconsistencies  
30 may exist with these two updates.

### 31 **4.3 Different ensemble size**

32 As mentioned in section 3.2, localization allows the ensemble filters to work properly with limited ensemble size. The above  
33 experiments are based on an ensemble size of 60, which is determined by balancing both assimilation performance and

1 computational time. Some of the experiments are repeated for ensemble sizes of 30 and 90, respectively, to analyse how the  
2 assimilation performance and the choice of localization are affected by the ensemble size. The results are shown in Fig.6.  
3 As can be seen from Fig. 6, in the experiment assimilating head without localization (DA\_H), increasing the ensemble size  
4 (from 30 to 90) slightly improves the head estimation. However, the performance difference between ensemble size of 60  
5 and 90 is small. When localization is used, the performances with all ensemble size are very similar (DA\_Hloc).  
6 In the experiment assimilating soil moisture at 5 cm depth without localization (DA\_SM5), increasing the ensemble size also  
7 improves the soil moisture at deeper depths. This indicates that using only an ensemble size of 30 introduces spurious  
8 correlation between surface soil and deeper soil, which is reduced with larger ensemble sizes. An ensemble size of 30 also  
9 leads to a much worse result for groundwater head compared to ensemble sizes of 60 or 90. When localization is used  
10 (DA\_SM5Loc), the assimilation performance is similar using the three ensemble sizes. Compared to the DA\_SM5, there is a  
11 large improvement in groundwater head when using ensemble size of 30.  
12 When both soil moisture (at 5 cm and 25 cm depths) and head are assimilated without localization (DA\_HSM), the  
13 performance is generally improved when increasing ensemble size. However, increasing the ensemble size to 90 still leads to  
14 a worse performance for soil moisture at 50 cm and groundwater head compared to the deterministic model. When  
15 localization is used (DA\_HSMLoc\_DV), the soil moisture at 50 cm and the head improves as the ensemble size increases.  
16 Overall, the assimilation performance increases in DA\_HSMLoc\_DV when increasing the ensemble size.

#### 17 **4.4 Actual evapotranspiration and discharge**

18 Using an integrated model where the various hydrological processes are coupled, assimilation of head and soil moisture may  
19 also affect other model variables. The effects on evapotranspiration and river discharge are examined in this section. For  
20 actual evapotranspiration, we calculated averaged RMSE with respect to the true model of actual evapotranspiration over all  
21 35 soil moisture observation locations during the DA period and for discharge the performance at the catchment outlet for  
22 the entire assimilation period is evaluated using the coefficient of determination and Nash–Sutcliffe efficiency. The results  
23 are summarized in Table 3.

24 The differences in RMSE for actual evapotranspiration among all experiments are small. When H is assimilated alone  
25 (DA\_H and DA\_H\_Loc), actual evapotranspiration is basically unchanged while when soil moisture is assimilated RMSE is  
26 generally marginally reduced compared to the deterministic model as a result of correcting surface soil moisture.

27 The performance of discharge is slightly improved by assimilating head (DA\_H and DA\_H\_Loc). The improvement is  
28 mainly with respect to low flow, which is underestimated by the deterministic model. This is expected as the baseflow is  
29 determined by groundwater inflow. When soil moisture is assimilated with localization (DA\_SM5Loc and  
30 DA\_SMBBothLoc), the discharge also performs slightly better. However, when both variables are assimilated without  
31 localization (DA\_HSM), the discharge performs significantly worse with unrealistic peak flows during spring. This is a  
32 result of the poorer head estimations in the entire domain. When localization is used for soil moisture and groundwater head

1 (DA\_HSMLoc\_DV), discharge is improved significantly and comparable with the deterministic model. This also  
2 demonstrates the necessity to use localization to constrain the spatial updates.

### 3 **5 Study in the Ahlergaarde catchment**

4 For the Ahlergaarde catchment, we use the calibrated model to simulate a 20-year period from 1990 to 2010 to provide  
5 initial conditions for the experiment used in this study. Starting from 2010-01-01, the experiment is split into two periods: a  
6 warm-up period (2010-01-01 to 2012-11-01) and a DA period (2012-11-01 to 2013-12-31). Grid-based daily precipitation  
7 (10 km), temperature (20 km) and reference evapotranspiration (20 km) from the Danish Meteorological Institute serve as  
8 basic meteorological data. Each ensemble member shares the same initial condition and is subject to perturbed forcing and  
9 parameter values for the warm-up period and the assimilation period. Similar to the Karup catchment experiment, daily time  
10 series of precipitation and reference evapotranspiration are perturbed at every time step using Gaussian error model with a  
11 standard deviation of 0.25. The parameter perturbations are based on the uncertainty information of 13 parameters listed in  
12 Table 2 of which the first seven from the model calibration and the next six from unsaturated zone are empirically defined  
13 from literature values. The unsaturated zone uncertainty is introduced by perturbing the van Genuchten  $n$  for the dominant  
14 soil type at all three depths with a standard deviation of 0.05 (Ridler et al., 2014a). Overall, we try to keep the ensemble  
15 spread relatively large and model responses physically realistic.  
16 The deterministic model used in this study, although based on a model calibrated against older data at different sites, has  
17 good skills after 2012. The model performance in terms of the hydrograph at the catchment outlet in year 2013 is shown in  
18 Fig. 10 (Obs and NoDA in the top panel), with  $R^2$  of 0.71 and Nash–Sutcliffe efficiency of 0.67. From the hydrograph, it can  
19 be seen that the model underestimates low flows and overestimates peak flows.

### 20 **5.1 Observations**

21 Groundwater head are measured bi-hourly in nine wells (Fig. 1) using Eijkelkamp mini divers. The divers were installed in  
22 these wells November 2012 and thus the length of the time-series is limited. Moreover, due to occasional instrument failure  
23 the data coverages are further constrained and vary among the wells. In the groundwater model six numerical layers are  
24 defined (layer 1 in the bottom and layer 6 in the top). The nine wells are screened at different depths below the surface layer.  
25 Wells M5398, M5637, M5353, and L8008 are screened in layer 5 while wells M5373, M5647, M5844, M5393 and M5366  
26 are screened in layer 4. When comparing in-situ head measurements with model predicted equivalents, large level  
27 differences usually occur due to scale disparities, and sometimes also accompanied by dynamic differences. Therefore, we  
28 calculated the average difference between observations and model simulations, and subtracted this difference from the  
29 original data. By doing so, we can avoid introducing observation bias in the assimilation system. An example of the  
30 processed observations and the open loop ensemble for well 5737 (2012-11-01 to 2013-12-31) is shown in Fig. 7 (top panel).

1 Soil moisture is measured at 30 sites across the catchment according to representative combinations of topography, land  
2 cover, and soil type using Decagon 5TE sensors. The dominant land uses are heath, agriculture and forest. At each site,  
3 sensors are installed at three depths 2.5, 22.5 and 52.5 cm corresponding to measurement depth intervals of 0–5, 20–25 and  
4 50–55 cm. Measurements are taken with 30 minutes intervals.

5 Most of the agriculture sites are irrigated in May and June, and the soil moisture is greatly influenced with several sudden  
6 increases during that period. However, in the model irrigation is not considered because detailed information on irrigation at  
7 the local sites is not available. Therefore, the sites where irrigation is evident from the soil moisture recordings are excluded  
8 for assimilation. In addition, a quality control to correct for systematic biases and to filter out unrealistic values has been  
9 carried out for the remaining sites. Although measurements are carried out at three depths at each site, we only use  
10 measurements at 2.5 cm and 22.5 cm depths for assimilation, as the surface/near-surface moisture is of most importance for  
11 the exchange of water and energy between land and the atmosphere. After processing, 18 out of 30 sites are used for  
12 assimilation (Fig. 1). As an example Fig. 7 (middle and bottom panels) shows the processed soil moisture observations and  
13 the open loop ensemble at site nw1.1 (2012-11-01 to 2013-12-31).

14 In addition to groundwater and soil moisture observations, discharge observations are available in the Ahlergaarde  
15 catchment at the outlet and at tributaries (right in Fig. 1). Evapotranspiration data based eddy covariance measurements are  
16 available from a flux station (Voulund station) located in the catchment.

## 17 **5.2 Experiment settings**

18 Similar to the experiment settings in the Karup catchment, the observation noise for each variable is assumed to be white  
19 Gaussian, with homogeneous and constant standard deviation of 0.2 m for head and 5% for soil volumetric water content.  
20 The head and soil moisture data are interpolated to weekly and daily frequencies, respectively, for assimilation. Due to  
21 reduced computational time step and fine model resolution, the computational time for the Ahlergaarde catchment is  
22 substantial. This implies that a larger ensemble size is unaffordable. Furthermore, the more frequent data assimilation  
23 contributes to longer simulation time. From these considerations, an ensemble size of 50 is adopted. With a one year  
24 assimilation period, the simulation time is around 3-7 days depending on the experiment settings.

25 With the purpose of assimilating head and soil moisture, different experiments have been carried out to investigate the  
26 assimilation performance. Considering the large model domain and fine grid, localization becomes more important here than  
27 in the previous example. Distance localization is added to both variables separately, and variable localization is used when  
28 both variables are assimilated. For groundwater head, we allow for update in all layers over the vertical. Horizontally, we use  
29 a localization radius of 5 km for all layers. For soil moisture, we use the same distance localization scheme as in the Karup  
30 catchment with a horizontal localization radius of 1 km and a vertical localization depth of 0.5m (top eight layers in the  
31 unsaturated zone). The following experiments are carried out:

32

33 NoDA: deterministic model without DA.

- 1 DA\_HLoc: assimilating groundwater head with distance localization.
- 2 DA\_SMLoc: assimilating soil moisture (at both 2.5 cm and 22.5 cm depths) with distance localization.
- 3 DA\_HSMLoc\_DV: assimilating both groundwater head and soil moisture (at both 2.5 cm and 22.5 cm depths) with variable
- 4 localization and distance localization.

### 5 **5.3 Groundwater head and soil moisture**

6 The assimilation performance is evaluated by comparing the model output with the observations (18 sites) using average  
7 RMSE over the assimilation period. The result is summarized in Table 4. In the experiment with assimilating head only  
8 (DA\_HLoc), RMSE of head reduces from 0.34 m to 0.21 m. However, the soil moisture predictions at both depths do not  
9 improve compared to the deterministic model. In the experiment with assimilating only soil moisture (DA\_SMLoc), RMSE  
10 of soil moisture at both depths reduces, especially at depth 22.5cm. The head estimate, however, shows a similar  
11 performance as the deterministic model. When both variables are assimilated (DA\_HSMLoc\_DV), RMSE of head reduces  
12 from 0.34 m to 0.21 m. RMSE of soil moisture reduces from 0.044 m<sup>3</sup>/m<sup>3</sup> to 0.040 m<sup>3</sup>/m<sup>3</sup> at 2.5 cm depth, and from 0.034  
13 m<sup>3</sup>/m<sup>3</sup> to 0.028 m<sup>3</sup>/m<sup>3</sup> at 22.5 cm depth.

14 Figure 8 shows the assimilated results for the same sites as shown in Fig. 7. Clearly, after 2012-11-01 when the DA period  
15 starts, the ensemble mean is approaching the observations, especially for the head and soil moisture at 22.5 cm depth.  
16 Although limited observations are assimilated, corrections are made for a large area within the model domain. Figure 9  
17 shows spatial RMSEs of soil moisture and head at corresponding observation layers between the assimilation result and the  
18 deterministic model, which illustrates the corrections made by DA spatially. For each grid cell, the variables' time series  
19 values from the assimilated model and the deterministic model are used to calculate the average RMSE.

20 From Fig. 9, we can clearly see the effect of the assimilation in model domain. For soil moisture relatively large corrections  
21 are made at 22.5 cm depth compared to the surface layer. Compared to groundwater head, however, the soil moisture  
22 corrections are more localized. For both soil moisture and groundwater head, most of the large corrections are made at places  
23 near the locations of observations. For groundwater head in the west and south-east regions where no head observations are  
24 available, the corrections are generally small.

### 25 **5.4 Actual evapotranspiration and discharge**

26 In this section, the effect of assimilation on actual evapotranspiration and river discharge is evaluated by comparing model  
27 predictions and observations. Figure 10 compares discharge at the catchment outlet and evapotranspiration at the flux station  
28 for the different experiments. The flux station is located in the central-north part of the catchment with several soil moisture  
29 stations around. In both graphs in Fig. 10, only small differences are seen between different simulations. This is further  
30 substantiated by the performance measures listed in Table 5.



1 As shown in Table 5 RMSE for actual evapotranspiration is similar in all three assimilation experiments. There is a small  
2 improvement for discharge when head is assimilated (DA\_HLoc). The experiment DA\_HSMLoc\_DV with both variables  
3 being assimilated provides better results overall.

## 4 **6 Discussions and Conclusions**

5 This study has investigated assimilation of soil moisture and groundwater head in an integrated hydrological model. To the  
6 best of our knowledge, this is the first study using ETKF to assimilate these two variables in an integrated hydrological  
7 model. The method considers both distance and variable localization. The proposed method is first explored for a catchment  
8 with synthetic data, and then applied to a complex model using data from real observations.

9 The study shows relatively weak correlations between surface soil moisture and groundwater head in the model. First, the  
10 univariate assimilation improves the state of the variable being assimilated, but does not improve the other variable. This can  
11 be seen from the experiments in both catchments. Second, in multivariate assimilation, when the complete state error  
12 covariance of both variables is used for updating and spurious correlations are not cut off by localization, the filter failed to  
13 provide reasonable result. This indicates that unrealistic inter-variable and cross-variable correlations exist in the model  
14 ensemble.

15 A hybrid localization scheme which consists of variable localization and distance localization has been developed and  
16 implemented in the ETKF. Localization does not only provide better results, but also reduce the computational cost as only a  
17 section of the full state is used within the filter. Similar localization approaches have been reported in hydrological models  
18 with discharge involved (Li et al., 2013) as well as in other models (e.g., (Kang et al., 2011)). Other approaches to deal with  
19 the potential inter-variable spurious correlation include for example adaptive localization (Rasmussen et al., 2015), and using  
20 two iterative filters instead of one filter (Gharamti et al., 2013). The method used here proved to be suitable for assimilating  
21 both groundwater head and soil moisture in integrated hydrological models, and have potential to be generalized to deal with  
22 other processes.

23 The impact of assimilation on discharge and evapotranspiration is analysed in the Ahlergaarde with real measurements as  
24 reference. Neither the discharge nor evapotranspiration were included in the filter state vector. However, through integrated  
25 hydrological modelling, the discharge is improved when head is assimilated, and evapotranspiration is improved when soil  
26 moisture is assimilated. Although the improvements are very small, we nevertheless see the benefits in other modules in  
27 MIKE SHE when improving the estimate of groundwater head and soil moisture.

28 Increasing the ensemble size is beneficial in general, especially for estimating unobserved and un-localized variables. This is  
29 because an increased ensemble size can better describe the true correlation in the state error covariance matrix. The effect of  
30 ensemble size has also been widely reported in previous studies, e.g. (Xie and Zhang, 2010). However, the balance between  
31 the assimilation result and the computational cost is usually considered when choosing the appropriate ensemble size for  
32 heavy models. This is an important issue for the Ahlergaarde model as the computational expenses here become substantial.

1 Due to the time and resource limitation, the choice of ensemble size for the Ahlergaarde model is not analysed in the study,  
2 but will certainly be essential for real-time applications in future studies. In addition, the multivariable assimilation could be  
3 extended with remote sensing soil moisture and other important hydrological variables (e.g. discharge) that are not included  
4 in this study.

## 5 Acknowledgements

6 The study has been carried out with the support of the Danish Council for Strategic Research as part of the project  
7 “HydroCast - Hydrological Forecasting and Data Assimilation”, Contract No. 0603-00466B (<http://hydrocast.dhigroup.com>),  
8 and S.C. Van Fonden. Field data are supplied by the HOBE project funded by the VILLUM Foundation  
9 (<http://www.hobecenter.dk>).

## 10 References

- 11 Anderson, J. L.: A local least squares framework for ensemble filtering, *Monthly Weather Review*, 131, 634-642, 2003.  
12 Bishop, C. H., Etherton, B. J., and Majumdar, S. J.: Adaptive sampling with the ensemble transform Kalman filter. Part I: Theoretical  
13 aspects, *Monthly Weather Review*, 129, 420-436, Doi 10.1175/1520-0493(2001)129<0420:Aswtet>2.0.Co;2, 2001.  
14 Camporese, M., Paniconi, C., Putti, M., and Salandin, P.: Ensemble Kalman filter data assimilation for a process-based catchment scale  
15 model of surface and subsurface flow, *Water Resour. Res.*, 45, n/a-n/a, Artn W10421  
16 Doi 10.1029/2008wr007031, 2009.  
17 Chen, Y., and Zhang, D.: Data assimilation for transient flow in geologic formations via ensemble Kalman filter, *Adv. Water Resour.*, 29,  
18 1107-1122, <http://dx.doi.org/10.1016/j.advwatres.2005.09.007>, 2006.  
19 De Lannoy, G. J. M., Houser, P. R., Pauwels, V. R. N., and Verhoest, N. E. C.: State and bias estimation for soil moisture profiles by an  
20 ensemble Kalman filter: Effect of assimilation depth and frequency, *Water Resour. Res.*, 43, n/a-n/a, 10.1029/2006wr005100, 2007.  
21 DHI: The MIKE SHE user and technical reference manual, 2015.  
22 Evensen, G.: The Ensemble Kalman Filter: theoretical formulation and practical implementation, *Ocean Dyn.*, 53, 343-367,  
23 10.1007/s10236-003-0036-9, 2003.  
24 Gharamti, M. E., Hoteit, I., and Valstar, J.: Dual states estimation of a subsurface flow-transport coupled model using ensemble Kalman  
25 filtering, *Adv. Water Resour.*, 60, 75-88, <http://dx.doi.org/10.1016/j.advwatres.2013.07.011>, 2013.  
26 Graham, D. N., and Butts, M. B.: Flexible, integrated watershed modelling with MIKE SHE, *Watershed models*, 849336090, 245-272,  
27 2005.  
28 Gregersen, J. B., Gijsbers, P. J. A., and Westen, S. J. P.: OpenMI: Open modelling interface, *Journal of Hydroinformatics*, 9, 175-191,  
29 10.2166/hydro.2007.023, 2007.  
30 Hamill, T. M., Whitaker, J. S., and Snyder, C.: Distance-dependent filtering of background error covariance estimates in an ensemble  
31 Kalman filter, *Monthly Weather Review*, 129, 2776-2790, Doi 10.1175/1520-0493(2001)129<2776:Ddfobe>2.0.Co;2, 2001.  
32 Han, X., Li, X., He, G., Kumbhar, P., Montzka, C., Kollet, S., Miyoshi, T., Rosolem, R., Zhang, Y., Vereecken, H., and Franssen, H. J. H.:  
33 DasPy 1.0 &ndash; the Open Source Multivariate Land Data Assimilation Framework in combination with the Community Land Model  
34 4.5, *Geosci. Model Dev. Discuss.*, 8, 7395-7444, 10.5194/gmdd-8-7395-2015, 2015.  
35 Jensen, K. H., and Illangasekare, T. H.: HOBE: A Hydrological Observatory, *Vadose Zone J.*, 10, 1-7, 10.2136/vzj2011.0006, 2011.  
36 Kang, J.-S., Kalnay, E., Liu, J., Fung, I., Miyoshi, T., and Ide, K.: “Variable localization” in an ensemble Kalman filter: Application to the  
37 carbon cycle data assimilation, *Journal of Geophysical Research: Atmospheres*, 116, n/a-n/a, 10.1029/2010JD014673, 2011.  
38 Kurtz, W., Hendricks Franssen, H.-J., Kaiser, H.-P., and Vereecken, H.: Joint assimilation of piezometric heads and groundwater  
39 temperatures for improved modeling of river-aquifer interactions, *Water Resour. Res.*, 50, 1665-1688, 10.1002/2013WR014823, 2014.  
40 Lee, H., Seo, D.-J., and Koren, V.: Assimilation of streamflow and in situ soil moisture data into operational distributed hydrologic  
41 models: Effects of uncertainties in the data and initial model soil moisture states, *Adv. Water Resour.*, 34, 1597-1615,  
42 <http://dx.doi.org/10.1016/j.advwatres.2011.08.012>, 2011.  
43 Li, Y., Ryu, D., Western, A. W., and Wang, Q. J.: Assimilation of stream discharge for flood forecasting: The benefits of accounting for  
44 routing time lags, *Water Resour. Res.*, 49, 1887-1900, 10.1002/wrcr.20169, 2013.

1 Madsen, H.: Parameter estimation in distributed hydrological catchment modelling using automatic calibration with multiple objectives,  
2 Adv. Water Resour., 26, 205-216, Pii S0309-1708(02)00092-1  
3 Doi 10.1016/S0309-1708(02)00092-1, 2003.  
4 Montzka, C., Pauwels, V., Franssen, H.-J., Han, X., and Vereecken, H.: Multivariate and Multiscale Data Assimilation in Terrestrial  
5 Systems: A Review, Sensors, 12, 16291, 2012.  
6 Rasmussen, J., Madsen, H., Jensen, K. H., and Refsgaard, J. C.: Data assimilation in integrated hydrological modeling using ensemble  
7 Kalman filtering: evaluating the effect of ensemble size and localization on filter performance, Hydrology and Earth System Sciences  
8 Discussions, 12, 2267-2304, 10.5194/hessd-12-2267-2015, 2015.  
9 Refsgaard, J. C.: Parameterisation, calibration and validation of distributed hydrological models, J. Hydrol., 198, 69-97,  
10 [http://dx.doi.org/10.1016/S0022-1694\(96\)03329-X](http://dx.doi.org/10.1016/S0022-1694(96)03329-X), 1997.  
11 Ridler, M. E., Madsen, H., Stisen, S., Bircher, S., and Fensholt, R.: Assimilation of SMOS-derived soil moisture in a fully integrated  
12 hydrological and soil-vegetation-atmosphere transfer model in Western Denmark, Water Resour. Res., 50, 8962-8981, Doi  
13 10.1002/2014wr015392, 2014a.  
14 Ridler, M. E., van Velzen, N., Hummel, S., Sandholt, I., Falk, A. K., Heemink, A., and Madsen, H.: Data assimilation framework: Linking  
15 an open data assimilation library (OpenDA) to a widely adopted model interface (OpenMI), Environ. Model. Software, 57, 76-89, DOI  
16 10.1016/j.envsoft.2014.02.008, 2014b.  
17 Sakov, P., and Bertino, L.: Relation between two common localisation methods for the EnKF, Comput. Geosci., 15, 225-237,  
18 10.1007/s10596-010-9202-6, 2010.  
19 Shi, Y., Davis, K. J., Zhang, F., Duffy, C. J., and Yu, X.: Parameter estimation of a physically based land surface hydrologic model using  
20 the ensemble Kalman filter: A synthetic experiment, Water Resour. Res., 50, 706-724, 10.1002/2013WR014070, 2014.  
21 Visser, A., Stuurman, R., and Bierkens, M. F. P.: Real-time forecasting of water table depth and soil moisture profiles, Adv. Water  
22 Resour., 29, 692-706, <http://dx.doi.org/10.1016/j.advwatres.2005.07.011>, 2006.  
23 Wang, X., Bishop, C. H., and Julier, S. J.: Which Is Better, an Ensemble of Positive–Negative Pairs or a Centered Spherical Simplex  
24 Ensemble?, Monthly Weather Review, 132, 1590-1605, 10.1175/1520-0493(2004)132<1590:wibaeo>2.0.co;2, 2004.  
25 Whitaker, J. S., and Hamill, T. M.: Ensemble data assimilation without perturbed observations, Monthly Weather Review, 130, 1913-  
26 1924, Doi 10.1175/1520-0493(2002)130<1913:Edawpo>2.0.Co;2, 2002.  
27 Xie, X. H., and Zhang, D. X.: Data assimilation for distributed hydrological catchment modeling via ensemble Kalman filter, Adv. Water  
28 Resour., 33, 678-690, DOI 10.1016/j.advwatres.2010.03.012, 2010.  
29 Zhang, D., Madsen, H., Ridler, M. E., Refsgaard, J. C., and Jensen, K. H.: Impact of uncertainty description on assimilating hydraulic head  
30 in the MIKE SHE distributed hydrological model, Adv. Water Resour., 86, Part B, 400-413,  
31 <http://dx.doi.org/10.1016/j.advwatres.2015.07.018>, 2015.

32

33

1 **Table 1 Differences in model resolution and computation time between two catchments. SZ refers to the saturated zone and UZ to**  
2 **the unsaturated zone, the symbol # means ‘number of’.**

| Catchment                        | Karup                      | Ahlergaarde              |
|----------------------------------|----------------------------|--------------------------|
| Area                             | 440 km <sup>2</sup>        | 1044 km <sup>2</sup>     |
| Grid size                        | 1000 x 1000 m <sup>2</sup> | 200 x 200 m <sup>2</sup> |
| #Grid cells in each layer in SZ  | 522                        | 26922                    |
| #Layers in SZ                    | 1                          | 6                        |
| #Total grid cells in SZ          | 522                        | 161538                   |
| #Grid cells in each layer in UZ  | 438                        | 26097                    |
| #Layers in UZ                    | 87                         | 21                       |
| #Total grid cells in UZ          | 38106                      | 548037                   |
| Time spent for 1 year simulation | Less than 1 minute         | Around 1 hour            |

3  
4  
5

1  
2 **Table 2 Calibrated and perturbed parameters. Value represents the estimated value, lower and upper represent 5% and 95%**  
3 **confidence intervals respectively. Parameters 1-6 are assumed to be lognormal distributed. Parameters 7-13 are assumed to be**  
4 **normal distributed.**

| Number | Parameter type                    | Description                                | Unit              | Value    | Lower    | Upper    | Module                      |
|--------|-----------------------------------|--------------------------------------------|-------------------|----------|----------|----------|-----------------------------|
| 1      | Horizontal hydraulic conductivity | Meltwater sand                             | $\text{m s}^{-1}$ | 2.40E-04 | 1.75E-04 | 3.31E-04 | Saturated zone              |
| 2      | Vertical hydraulic conductivity   | Clay                                       | $\text{m s}^{-1}$ | 1.03E-07 | 1.15E-08 | 9.31E-07 | Saturated zone              |
| 3      | Horizontal hydraulic conductivity | Quartz sand                                | $\text{m s}^{-1}$ | 2.28E-04 | 1.88E-04 | 2.78E-04 | Saturated zone              |
| 4      | Vertical hydraulic conductivity   | Mica clay                                  | $\text{m s}^{-1}$ | 9.24E-08 | 6.22E-08 | 1.37E-07 | Saturated zone              |
| 5      | Drain time constant               | Uniform                                    | $\text{s}^{-1}$   | 4.58E-08 | 2.43E-08 | 8.60E-08 | Saturated zone              |
| 6      | River-groundwater conductance     | Uniform                                    | $\text{m s}^{-1}$ | 2.35E-05 | 1.98E-06 | 2.79E-04 | River                       |
| 7      | Root Depth                        | Wheat soil 1                               | mm                | 460      | 394      | 538      | Unsaturated zone/Vegetation |
| 8      | n in van Genuchten function       | Coarse sandy soil (JB1) at 0-30 cm depth   |                   | 1.32     | 1.22     | 1.42     | Unsaturated zone            |
| 9      | n in van Genuchten function       | Coarse sandy soil (JB1) at 30-80 cm depth  |                   | 1.45     | 1.35     | 1.55     | Unsaturated zone            |
| 10     | n in van Genuchten function       | Coarse sandy soil (JB1) at 80-100 cm depth |                   | 1.58     | 1.48     | 1.68     | Unsaturated zone            |
| 11     | n in van Genuchten function       | Clayey sandy soil (JB3) at 0-30 cm depth   |                   | 1.23     | 1.13     | 1.33     | Unsaturated zone            |
| 12     | n in van Genuchten function       | Clayey sandy soil (JB3) at 30-80 cm depth  |                   | 1.27     | 1.17     | 1.37     | Unsaturated zone            |
| 13     | n in van Genuchten function       | Clayey sandy soil (JB3) at 80-100 cm depth |                   | 1.26     | 1.16     | 1.36     | Unsaturated zone            |

5

1

2 **Table 3 Impact of assimilation on evapotranspiration (ET) (averaged RMSE with respect to the true model of actual**  
 3 **evapotranspiration over all 35 soil moisture observation locations during the DA period) and discharge (Nash–Sutcliffe efficiency**  
 4 **of discharge at catchment outlet during DA period) for each experiment in Karup catchment.**

|               | Averaged RMSE of ET (mm/day) | Nash–Sutcliffe efficiency score of discharge at outlet |
|---------------|------------------------------|--------------------------------------------------------|
| NoDA          | 0.376                        | 0.936                                                  |
| DA_H          | 0.377                        | 0.953                                                  |
| DA_H_Loc      | 0.376                        | 0.955                                                  |
| DA_SM5        | 0.367                        | 0.923                                                  |
| DA_SM5Loc     | 0.376                        | 0.941                                                  |
| DA_SMBBoth    | 0.364                        | 0.943                                                  |
| DA_SMBBothLoc | 0.364                        | 0.944                                                  |
| DA_HSM        | 0.372                        | 0.484                                                  |
| DA_HSMLoc_DV  | 0.364                        | 0.932                                                  |

5

1

2 **Table 4 Average RMSE of head and soil moisture (2.5 cm and 22.5 cm) at observation locations for each experiment in**  
3 **Ahlergaarde catchment.**

|              | Average RMSE of head<br>(m) | Average RMSE of soil<br>moisture at 2.5 cm<br>(m <sup>3</sup> /m <sup>3</sup> ) | Average RMSE of soil<br>moisture at 22.5 cm<br>(m <sup>3</sup> /m <sup>3</sup> ) |
|--------------|-----------------------------|---------------------------------------------------------------------------------|----------------------------------------------------------------------------------|
| NoDA         | 0.34                        | 0.044                                                                           | 0.034                                                                            |
| DA_HLoc      | 0.21                        | 0.045                                                                           | 0.037                                                                            |
| DA_SMLoc     | 0.34                        | 0.038                                                                           | 0.024                                                                            |
| DA_HSMLoc_DV | 0.22                        | 0.040                                                                           | 0.028                                                                            |

4

5

1

2 **Table 5 Quantitative performance measures for evapotranspiration (ET) and discharge for the each experiment in Ahlergaarde**  
3 **catchment.**

|              | RMSE of<br>ET (mm/day) | Nash–<br>Sutcliffe<br>score of<br>discharge at<br>outlet |
|--------------|------------------------|----------------------------------------------------------|
| NoDA         | 0.879                  | 0.673                                                    |
| DA_HLoc      | 0.919                  | 0.690                                                    |
| DA_SMLoc     | 0.853                  | 0.677                                                    |
| DA_HSMLoc_DV | 0.850                  | 0.691                                                    |

4

5



1

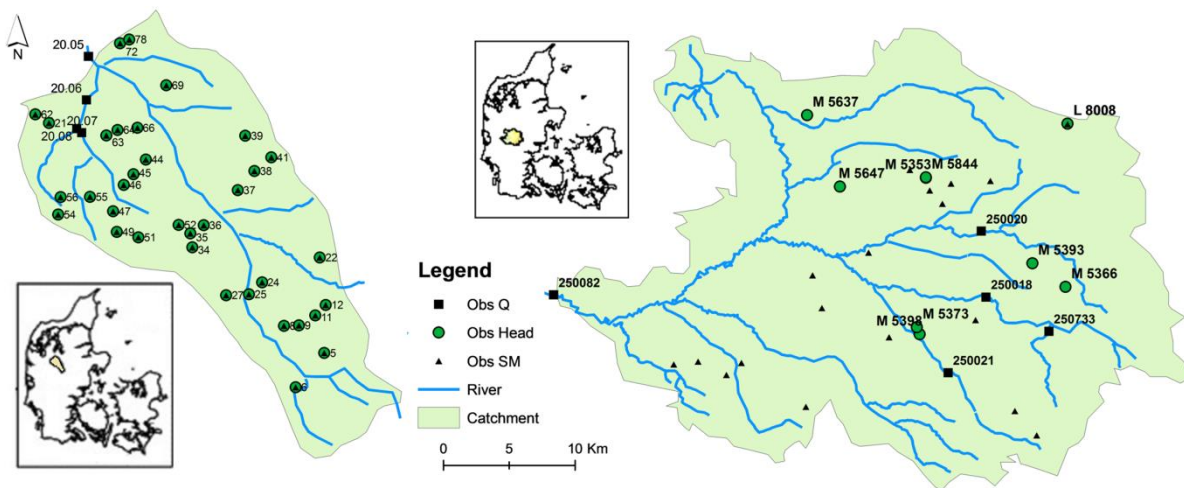

2

3 **Figure 1 Left: Karup catchment, Right: Ahlergaarde catchment. ‘Obs Q’, ‘Obs Head’ and ‘Obs SM’ represent discharge,**  
 4 **groundwater head and soil moisture observations respectively used for assimilation.**

5

1

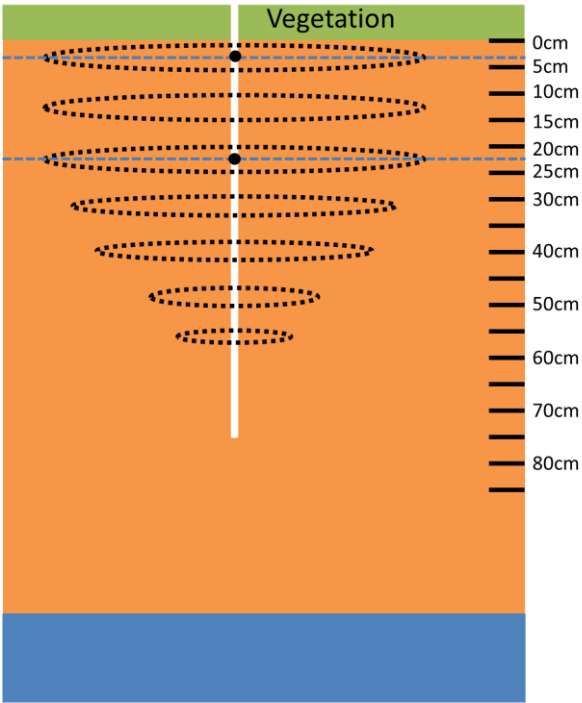

2

3 **Figure 2** Sketch of localization scheme for soil moisture at a site where soil moisture is measured at 0–5 cm and 20-25 cm (marked  
4 by filled black circles). The depths at right represent the numerical layers. The dotted-line ovals indicate the localization areas for  
5 each layer, where the cut-off values of covariance function increase quadratically from depth 20 - 25 cm downward.

6

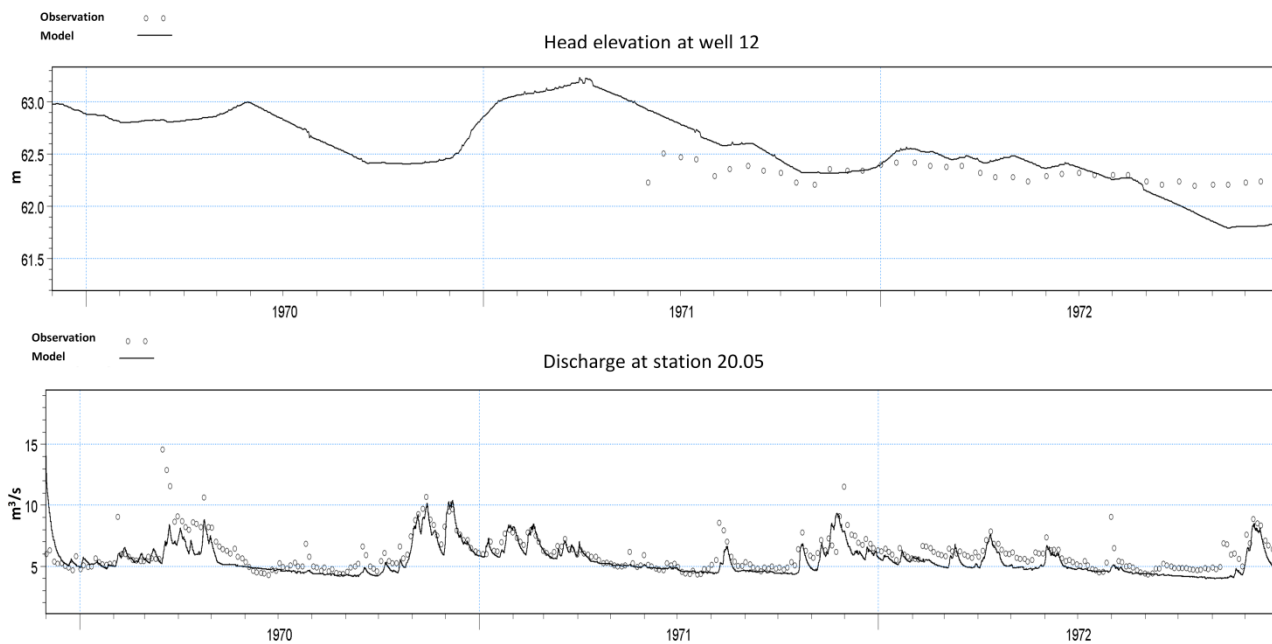

**Figure 3 Observed and simulated water table at well 12(top panel) and hydrograph at station 20.05 (bottom panel) in Karup catchment.**

1  
2  
3  
4  
5  
6  
7

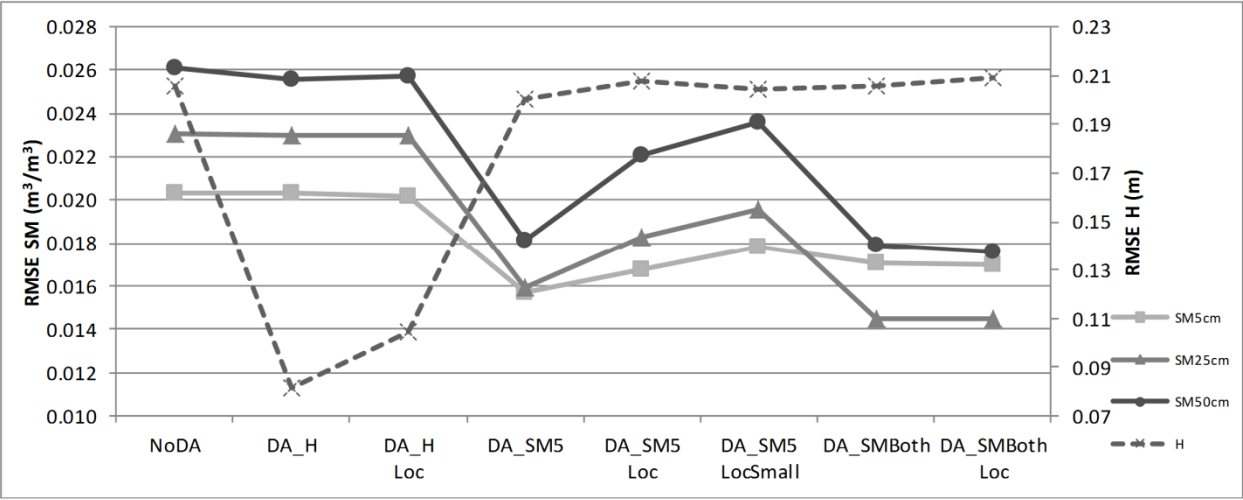

**Figure 4** Spatially and temporally averaged RMSE of groundwater head and soil moisture at different depths for each univariate assimilation experiment in Karup catchment. Left axis represents soil moisture and right axis head.

1

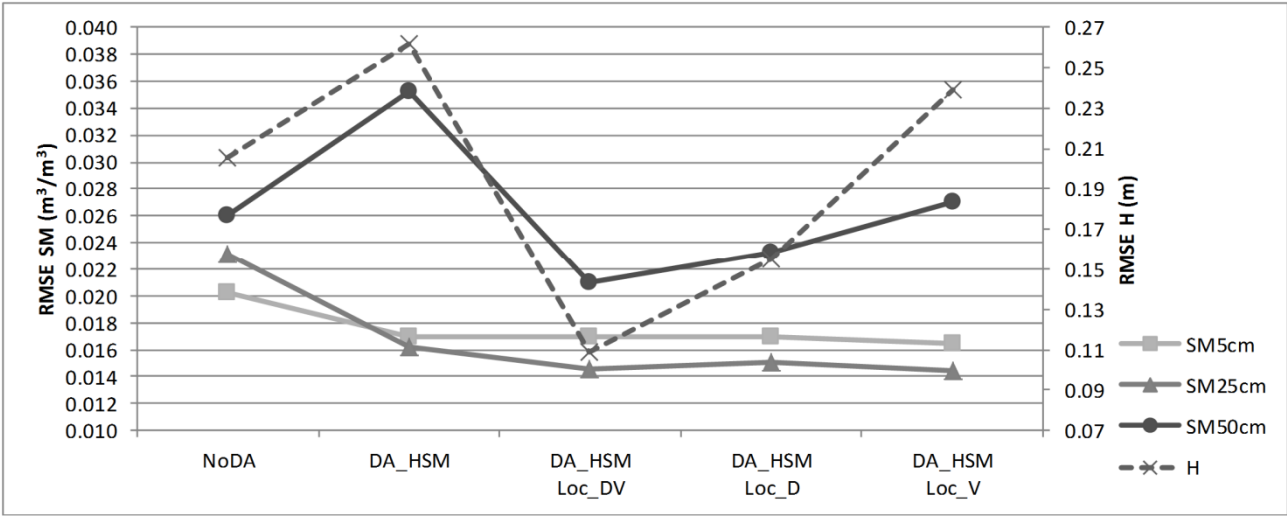

2

3 **Figure 5 Spatially and temporally averaged RMSE of groundwater head and soil moisture at different depths for each**  
4 **multivariate assimilation experiment in Karup catchment . Left axis represents for soil moisture and right axis head.**

5

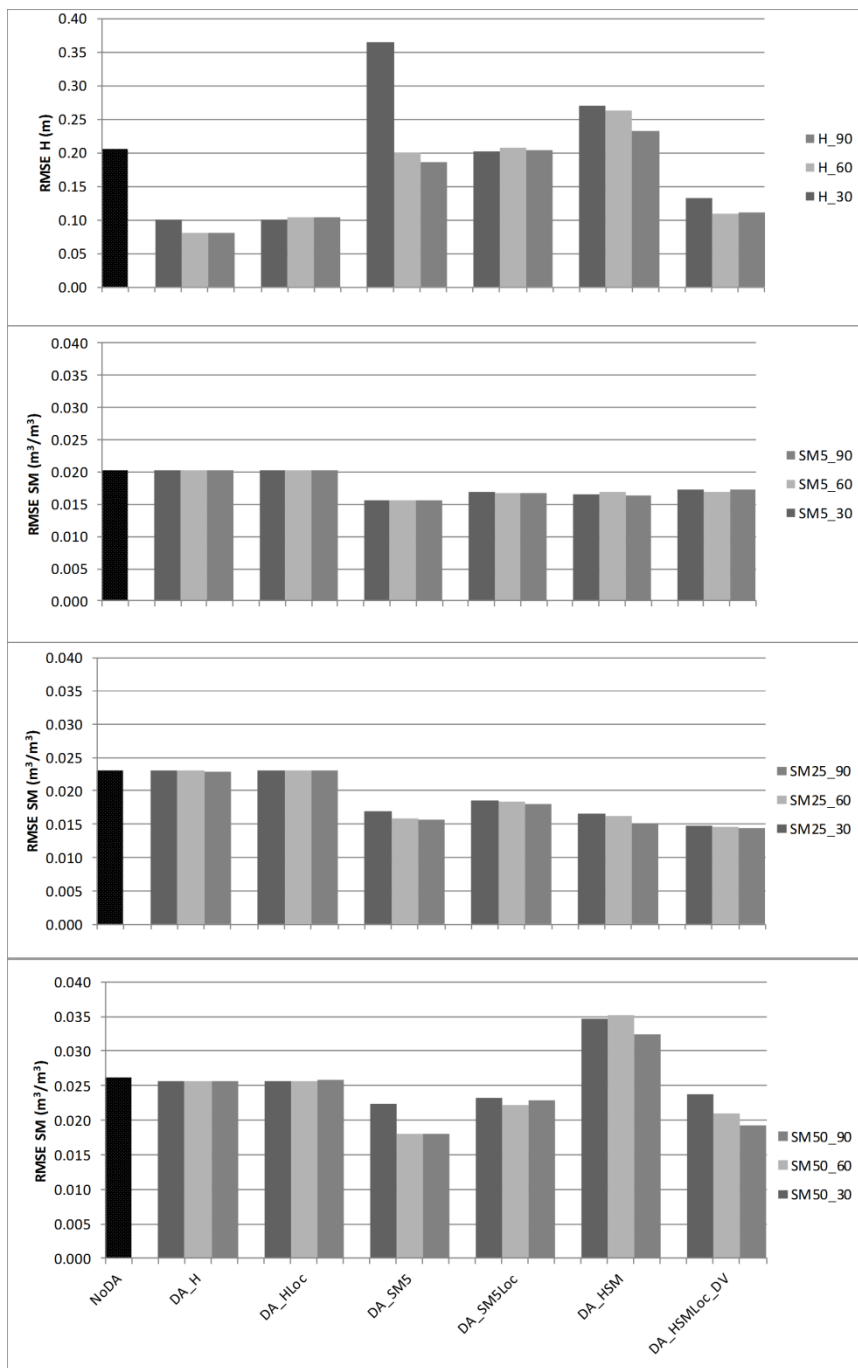

Figure 6 Results from different experiments in Karup catchment. From top to bottom, 1<sup>st</sup> panel shows the average spatial RMSE of groundwater head, 2<sup>nd</sup>, 3<sup>rd</sup> and 4<sup>th</sup> panels are the average spatial RMSE of soil moisture at 5 cm, 25 cm and 50 cm depths respectively. From left to right, the experiment names are indicated as the horizontal axis label from the bottom panel. For each experiment except NoDA, the results of three ensemble sizes (30,60 and 90) are represented using different colours as shown in legends.

1

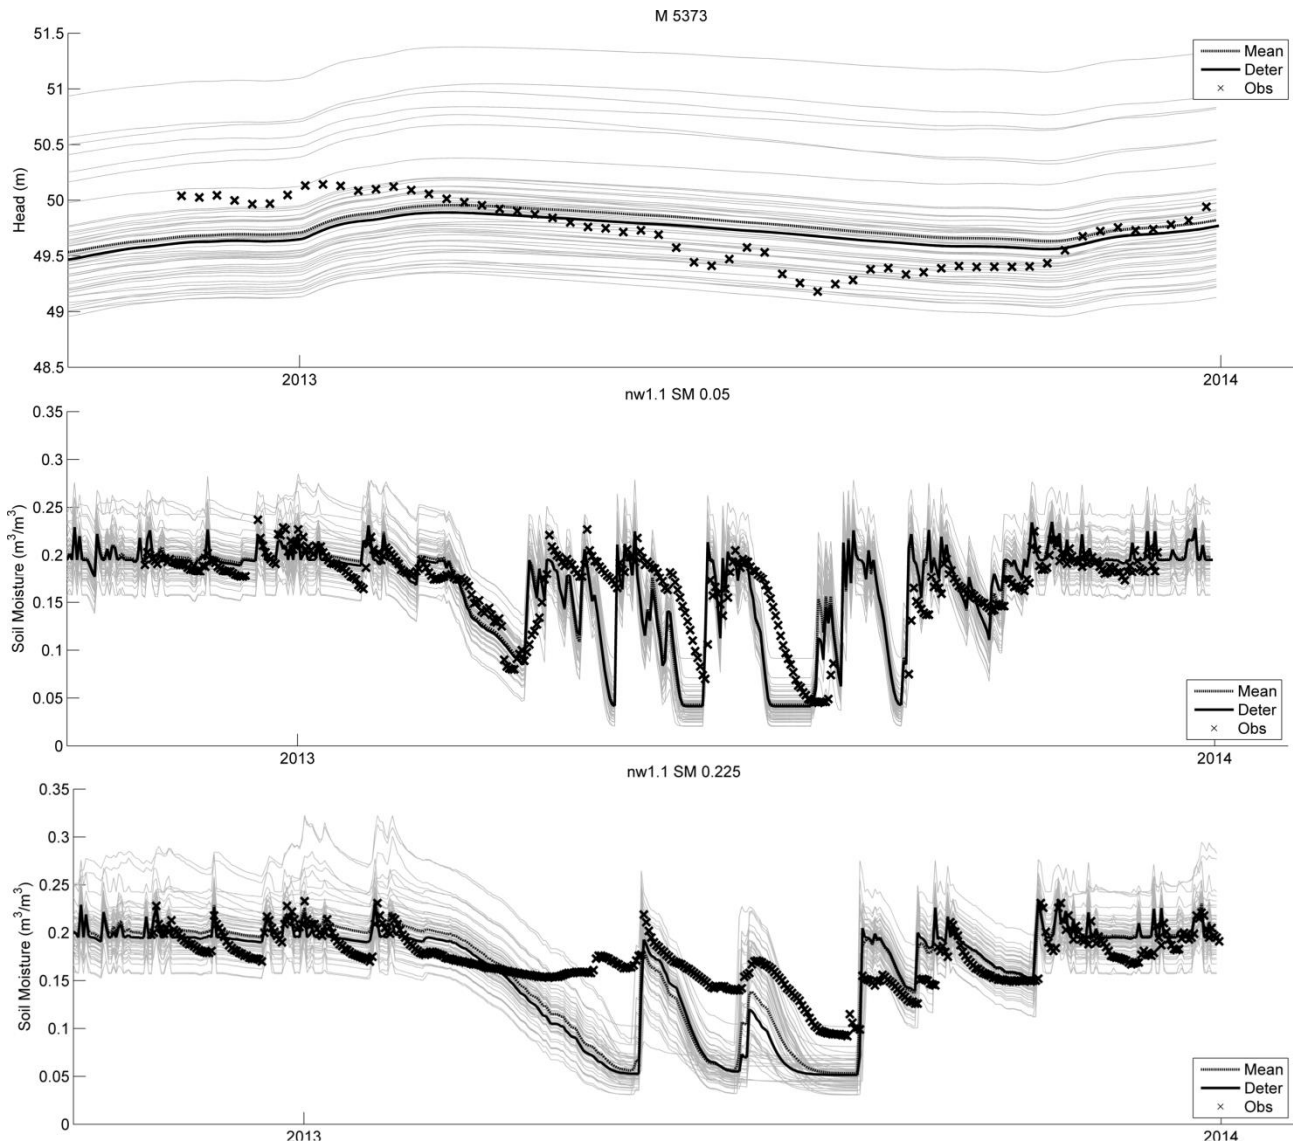

2

3 **Figure 7 Top: Groundwater head at well M5373. Middle: soil moisture at 2.5cm at site nw1.1. Bottom: soil moisture at 22.5cm**  
 4 **depth at site nw1.1. The light grey lines (not marked in the legend) are the open-loop ensemble prediction. 'Mean' (single gray**  
 5 **line) is the ensemble average. 'Deter' (dark line) is the deterministic model. 'Obs' (cross mark) are the observations.**

6

1

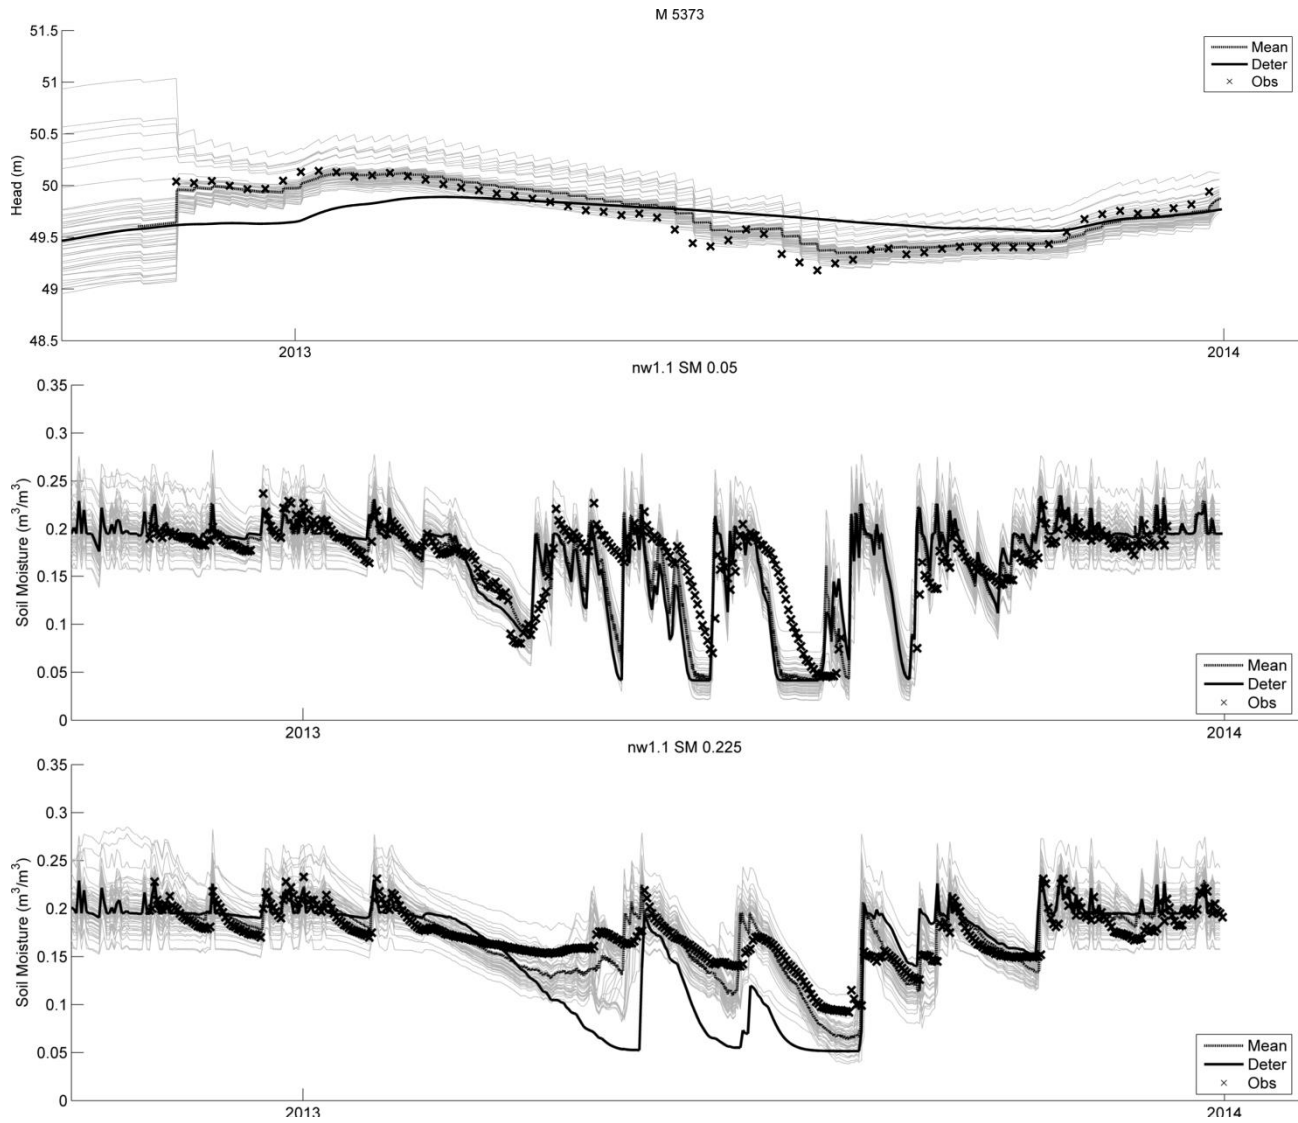

2

3 **Figure 8 Top: groundwater head at well M5373. Middle: soil moisture at 2.5 cm at site nw1.1. Bottom: soil moisture at 22.5 cm**  
 4 **depth at site nw1.1. The light grey lines (not in the legend) are ensemble predictions. 'Mean' (single gray line) is the ensemble**  
 5 **average. 'Deter' (dark line) is the deterministic model. 'Obs' (cross mark) are the observations. Note the assimilation starts from**  
 6 **2012-11-01.**

7



1

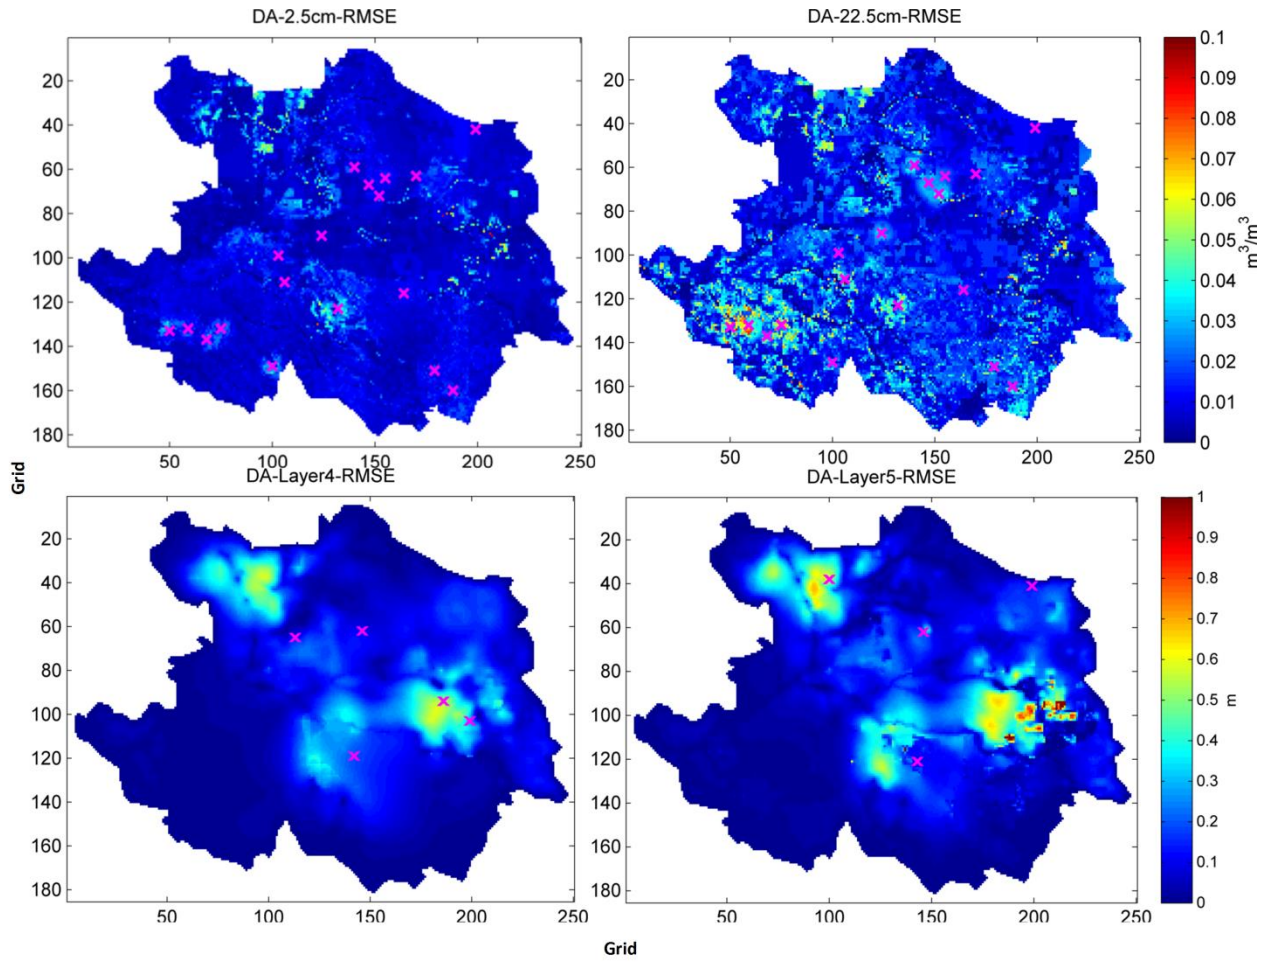

2

3 **Figure 9 Spatial RMSE between assimilated and deterministic model in Ahlergaarde catchment : soil moisture at 2.5cm depth**  
 4 **(upper left) and 22.5cm depth (upper right), groundwater head at layer 4 (lower left) and layer 5(lower right). The observation**  
 5 **locations at each layer are marked with violet crosses.**

6

1  
2  
  
3  
4  
5  
6  
7  
8  
9

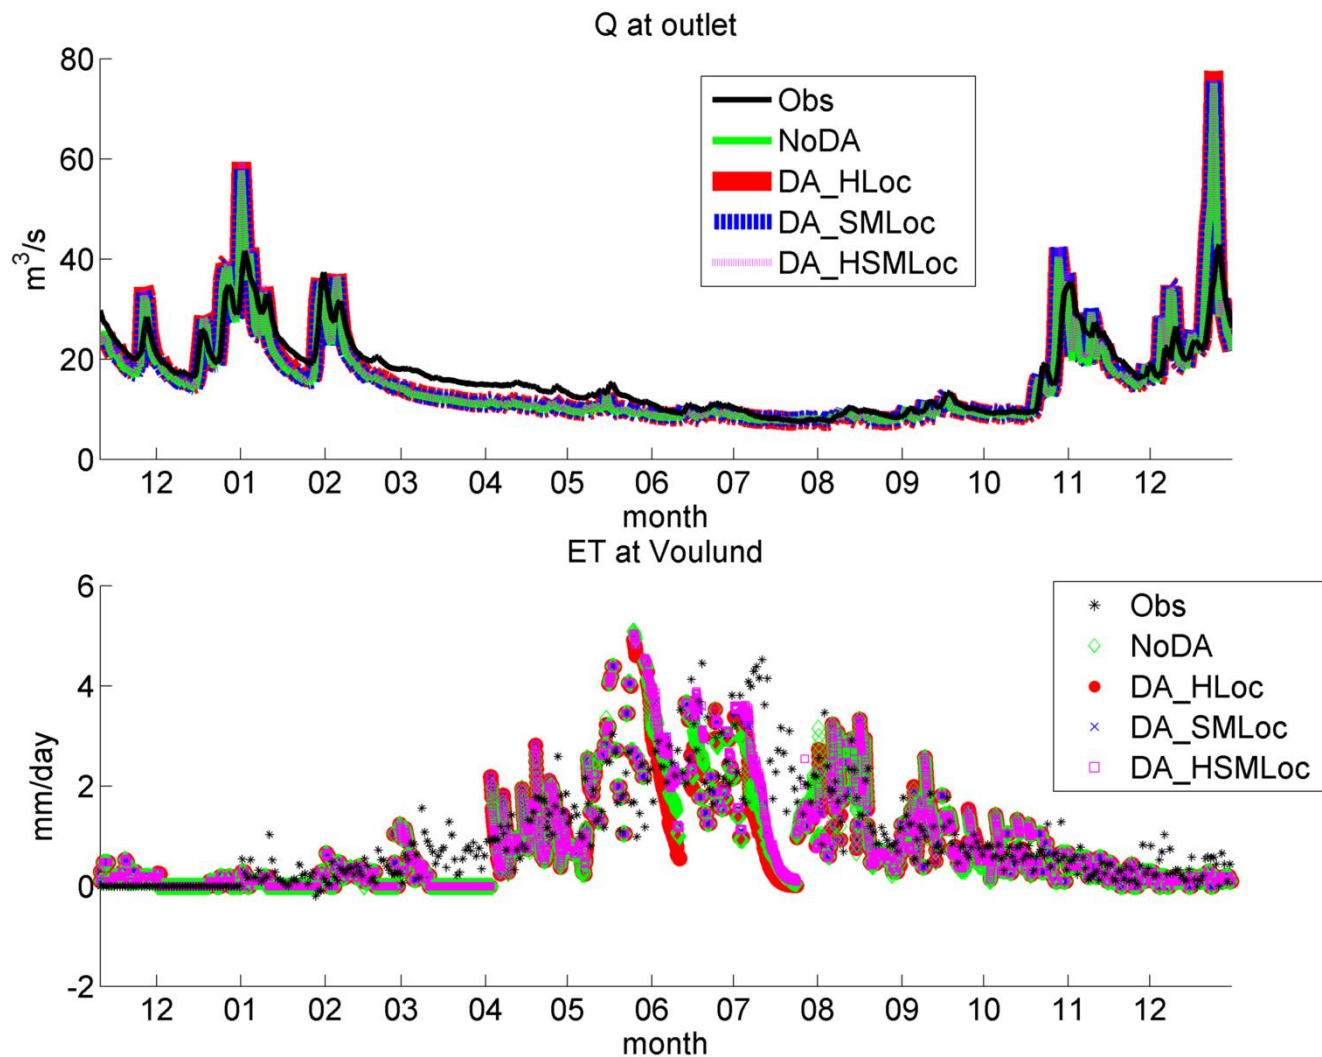

**Figure 10 Top: discharge at Ahlergaarde catchment outlet (station 250082) for each experiment and observed discharge. Bottom: Actual evapotranspiration in each experiment and observed evapotranspiration at the observed station (Voulund) at Ahlergaarde catchment.**
